# Supplementary material for: Negative Selection by an Endogenous Retrovirus Promotes a Higher-Avidity CD4+ T Cell Response to Retroviral Infection
Source: PLOS journal article supplement (doi:10.1371/journal.ppat.1002709), 2012-05-10
Supplement: S6 (10.1371/journal.ppat.1002709.s006) [file journal.ppat.1002709.s006]

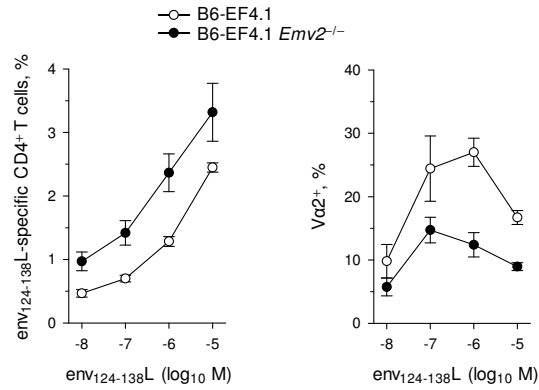

**Figure S6. Effect of *Emv2* on the frequency and composition of env<sub>124-138</sub>L-specific CD4<sup>+</sup> thymocytes.**

Thymocytes from *Emv2*<sup>+/+</sup> or *Emv2*<sup>-/-</sup> EF4.1 mice were stimulated for 18 hrs *in vitro* with the indicated amount of env<sub>124-138</sub>L peptide presented by bone marrow-derived dendritic cells and responding cells were identified by upregulation of CD69 expression. Frequency of responding (CD69<sup>+</sup>) cells in gated CD4<sup>+</sup> thymocytes (*left*) and frequency of Vα2 cells in env<sub>124-138</sub>L-specific cells (*right*) is shown, with  $p < 0.006$  and  $p < 0.002$ , respectively, for 10<sup>-6</sup> M peptide concentration. Results are the means  $\pm$  SEM ( $n = 8-10$ ).
